# Supplementary material
Source: Springer Nature journal article supplement (https://www.springermedizin.de/resource/supplementary/12943_2010_799_MOESM2_ESM.pdf/9554860)

A

MCF7<sup>ErbB2</sup>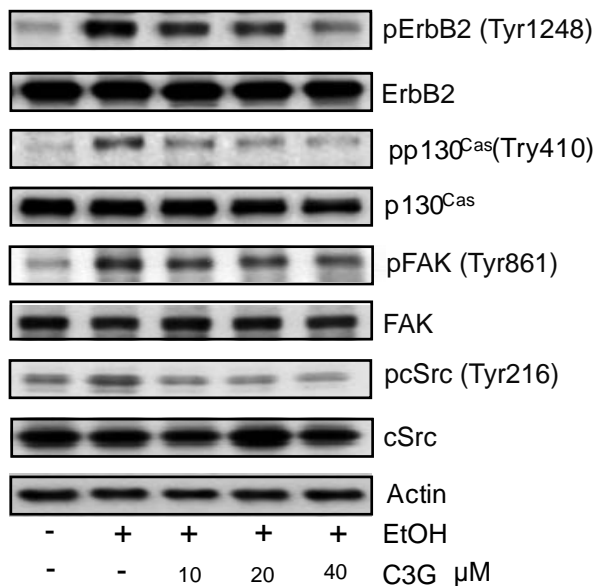

C

MDA-MB231

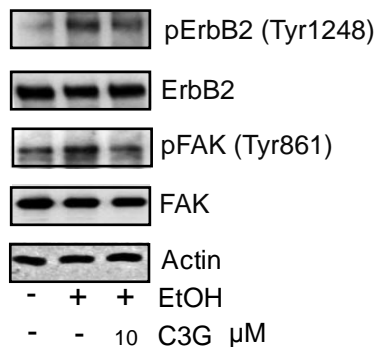

B

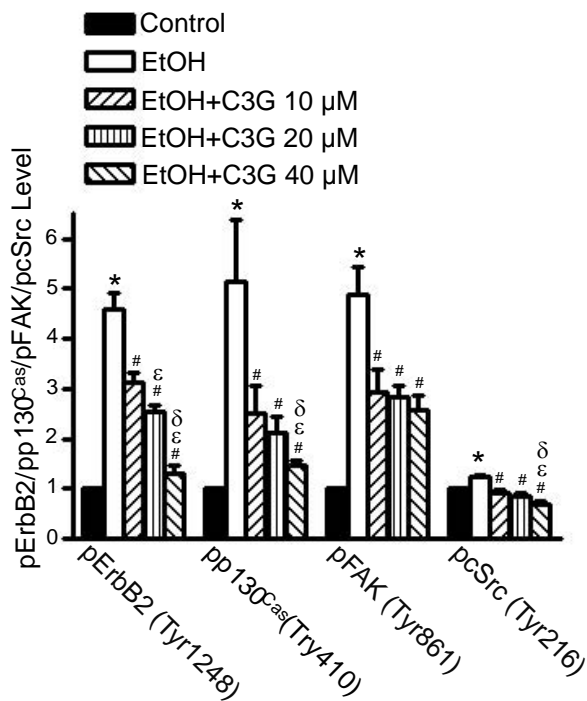

Supplement: MOESM2 [file 9554860]
